# Supplementary material for: Economic Shocks and Perceptions of Efficiency Changes: The Cases of Lithuania and Latvia
Source: MDPI journal article supplement (doi:10.3390/economies12010014), 2024-01-04
Supplement: s1 [file s1]

Archive with 1 entries (1 files):
- economies-2739862-supplementary.pdf
